# Supplementary material for: Development of Optimized Ultrasound-Assisted Extraction Methods for the Recovery of Total Phenolic Compounds and Anthocyanins from Onion Bulbs
Source: MDPI journal article supplement (doi:10.3390/antiox10111755), 2021-11-03
Supplement: s1 [file s1]

# Development of an Optimized Ultrasound-Assisted Extraction Methods for the Recovery of Total Phenolic Compounds and Anthocyanins from Onion Bulbs

Ana V. González-de-Peredo, Mercedes Vázquez-Espinosa, Estrella Espada-Bellido, Marta Ferreiro-González, Ceferino Carrera, Gerardo F. Barbero and Miguel Palma

## SUPPLEMENTARY MATERIAL

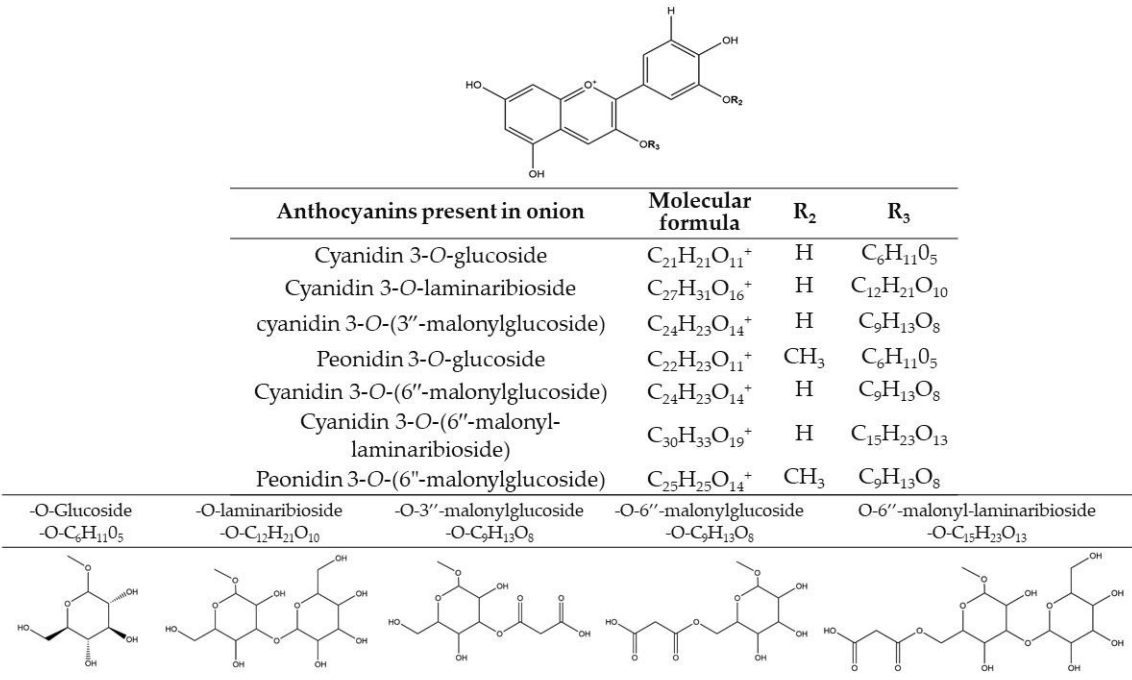

**Figure S1.** Information about anthocyanins identified in red onion.

**Table S1.** Mass spectra information of the nine anthocyanins present in onion bulb.

| Compounds                                            | Predicted formula                                            | Retention time (min) | <i>m/z</i> * | Ion Assignment                                                      |
|------------------------------------------------------|--------------------------------------------------------------|----------------------|--------------|---------------------------------------------------------------------|
| Cyanidin 3- <i>O</i> -glucoside                      | C <sub>21</sub> H <sub>21</sub> O <sub>11</sub> <sup>+</sup> | 3.517                | 449.1087     | [M+H] <sup>+</sup>                                                  |
|                                                      |                                                              |                      | 301.1410     | [M+H-C <sub>5</sub> H <sub>10</sub> O <sub>5</sub> ] <sup>+</sup>   |
|                                                      |                                                              |                      | 287.0557     | [M+H-C <sub>6</sub> H <sub>8</sub> O <sub>5</sub> ] <sup>+</sup>    |
|                                                      |                                                              |                      | 141.9590     | [M+H-C <sub>14</sub> H <sub>12</sub> O <sub>8</sub> ] <sup>+</sup>  |
|                                                      |                                                              |                      | 125.9865     | [M+H-C <sub>15</sub> H <sub>16</sub> O <sub>8</sub> ] <sup>+</sup>  |
| Cyanidin 3- <i>O</i> -laminaribioside                | C <sub>27</sub> H <sub>31</sub> O <sub>16</sub> <sup>+</sup> | 4.132                | 611.1641     | [M+H] <sup>+</sup>                                                  |
|                                                      |                                                              |                      | 301.1410     | [M+H-C <sub>11</sub> H <sub>18</sub> O <sub>10</sub> ] <sup>+</sup> |
|                                                      |                                                              |                      | 141.9590     | [M+H-C <sub>20</sub> H <sub>22</sub> O <sub>13</sub> ] <sup>+</sup> |
|                                                      |                                                              |                      | 125.9865     | [M+H-C <sub>21</sub> H <sub>26</sub> O <sub>13</sub> ] <sup>+</sup> |
| cyanidin 3- <i>O</i> -(3''-malonylglucoside)         | C <sub>24</sub> H <sub>23</sub> O <sub>14</sub> <sup>+</sup> | 4.875                | 535.1069     | [M+H] <sup>+</sup>                                                  |
|                                                      |                                                              |                      | 301.1410     | [M+H-C <sub>8</sub> H <sub>10</sub> O <sub>8</sub> ] <sup>+</sup>   |
|                                                      |                                                              |                      | 141.9590     | [M+H-C <sub>17</sub> H <sub>14</sub> O <sub>11</sub> ] <sup>+</sup> |
|                                                      |                                                              |                      | 125.9865     | [M+H-C <sub>18</sub> H <sub>18</sub> O <sub>11</sub> ] <sup>+</sup> |
| Peonidin 3- <i>O</i> -glucoside                      | C <sub>22</sub> H <sub>23</sub> O <sub>11</sub> <sup>+</sup> | 5.348                | 463.1251     | [M+H] <sup>+</sup>                                                  |
|                                                      |                                                              |                      | 301.1424     | [M+H-C <sub>6</sub> H <sub>10</sub> O <sub>5</sub> ] <sup>+</sup>   |
|                                                      |                                                              |                      | 141.9590     | [M+H-C <sub>15</sub> H <sub>14</sub> O <sub>8</sub> ] <sup>+</sup>  |
|                                                      |                                                              |                      | 125.9865     | [M+H-C <sub>16</sub> H <sub>18</sub> O <sub>8</sub> ] <sup>+</sup>  |
| Delphinidin 3,5- <i>O</i> -diglucoside               | C <sub>27</sub> H <sub>31</sub> O <sub>17</sub> <sup>+</sup> | 5.721                | 649.1392     | [M+H+Na] <sup>+</sup>                                               |
|                                                      |                                                              |                      | 627.1572     | [M+H] <sup>+</sup>                                                  |
|                                                      |                                                              |                      | 465.1046     | [M+H-C <sub>6</sub> H <sub>10</sub> O <sub>5</sub> ] <sup>+</sup>   |
|                                                      |                                                              |                      | 303.0511     | [M+H-C <sub>12</sub> H <sub>20</sub> O <sub>10</sub> ] <sup>+</sup> |
| Cyanidin 3- <i>O</i> -(6''-malonylglucoside)         | C <sub>24</sub> H <sub>23</sub> O <sub>14</sub> <sup>+</sup> | 5.850                | 535.1104     | [M+H] <sup>+</sup>                                                  |
|                                                      |                                                              |                      | 287.0561     | [M+H-C <sub>9</sub> H <sub>12</sub> O <sub>8</sub> ] <sup>+</sup>   |
|                                                      |                                                              |                      | 141.9590     | [M+H-C <sub>17</sub> H <sub>14</sub> O <sub>11</sub> ] <sup>+</sup> |
|                                                      |                                                              |                      | 125.9865     | [M+H-C <sub>18</sub> H <sub>18</sub> O <sub>11</sub> ] <sup>+</sup> |
| Cyanidin- 3- <i>O</i> -(6''-malonyl-laminaribioside) | C <sub>30</sub> H <sub>33</sub> O <sub>19</sub> <sup>+</sup> | 6.052                | 697.1613     | [M+H] <sup>+</sup>                                                  |
|                                                      |                                                              |                      | 287.0561     | [M+H-C <sub>15</sub> H <sub>22</sub> O <sub>13</sub> ] <sup>+</sup> |
|                                                      |                                                              |                      | 141.9590     | [M+H-C <sub>23</sub> H <sub>24</sub> O <sub>16</sub> ] <sup>+</sup> |
|                                                      |                                                              |                      | 125.9865     | [M+H-C <sub>24</sub> H <sub>28</sub> O <sub>16</sub> ] <sup>+</sup> |
| Peonidin 3- <i>O</i> -malonylglucoside               | C <sub>25</sub> H <sub>25</sub> O <sub>14</sub> <sup>+</sup> | 6.323                | 549.1255     | [M+H] <sup>+</sup>                                                  |
|                                                      |                                                              |                      | 301.1418     | [M+H-C <sub>9</sub> H <sub>12</sub> O <sub>8</sub> ] <sup>+</sup>   |
|                                                      |                                                              |                      | 141.9590     | [M+H-C <sub>18</sub> H <sub>16</sub> O <sub>11</sub> ] <sup>+</sup> |
|                                                      |                                                              |                      | 125.9865     | [M+H-C <sub>19</sub> H <sub>20</sub> O <sub>11</sub> ] <sup>+</sup> |
| Delphinidin 3- <i>O</i> -glucoside                   | C <sub>21</sub> H <sub>21</sub> O <sub>12</sub> <sup>+</sup> | 6.536                | 487.0863     | [M+H+Na] <sup>+</sup>                                               |
|                                                      |                                                              |                      | 465.1055     | [M+H] <sup>+</sup>                                                  |
|                                                      |                                                              |                      | 303.0508     | [M+H-C <sub>6</sub> H <sub>10</sub> O <sub>5</sub> ] <sup>+</sup>   |
|                                                      |                                                              |                      | 141.9587     | [M+H-C <sub>14</sub> H <sub>12</sub> O <sub>9</sub> ] <sup>+</sup>  |
|                                                      |                                                              |                      | 125.9865     | [M+H-C <sub>15</sub> H <sub>16</sub> O <sub>9</sub> ] <sup>+</sup>  |

\* The fragments identified have been selected based on their greater abundance or greater selectivity (larger *m/z*).

(a)

CEBOLLA-REP-ABRIL 942 (3.517)

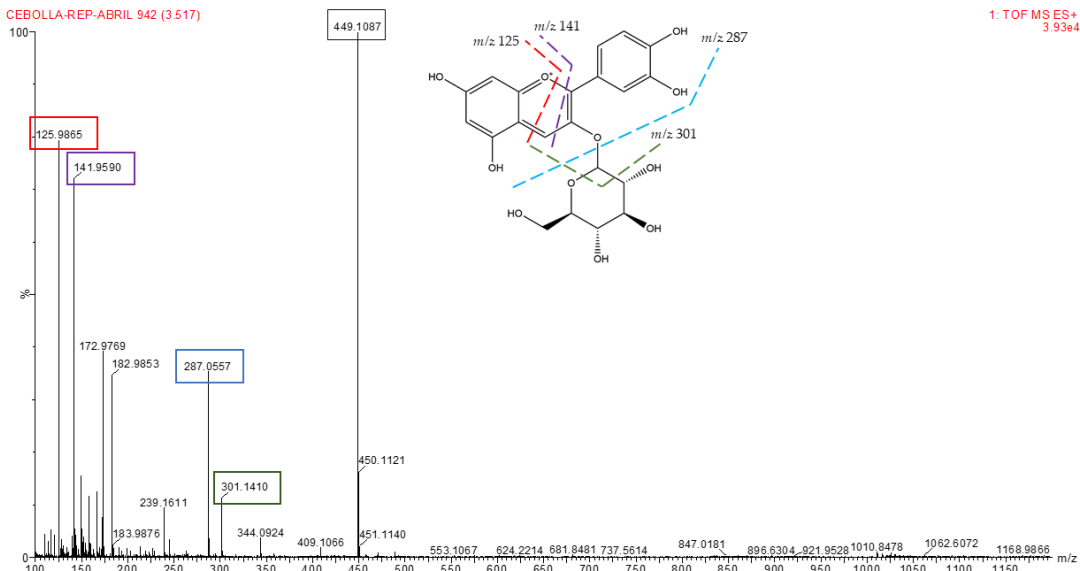

1: TOF MS ES+  
3.93e4

(b)

CEBOLLA-REP-ABRIL 1107 (4.132)

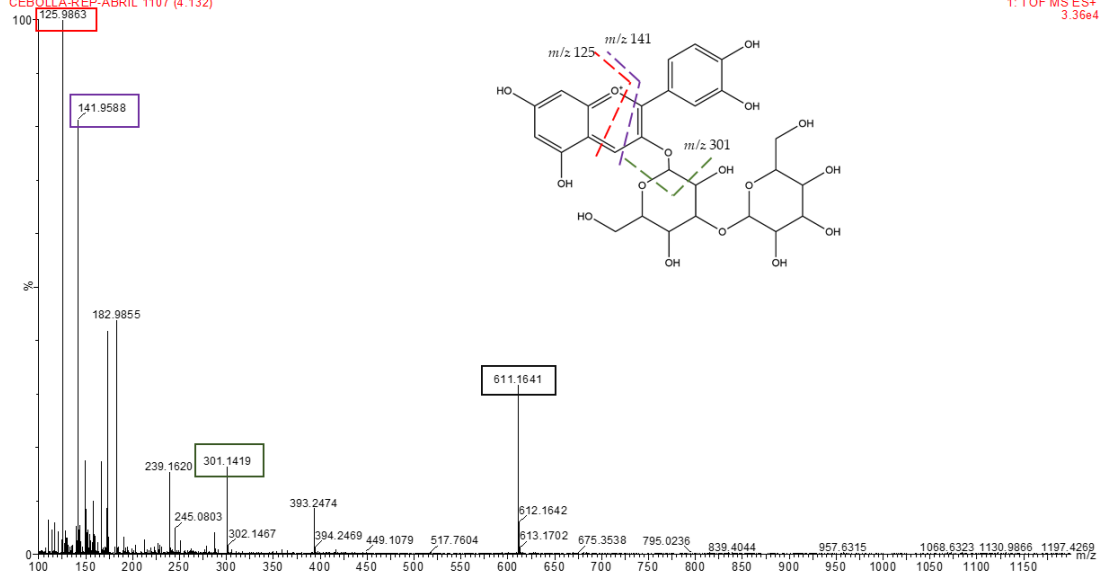

1: TOF MS ES+  
3.36e4

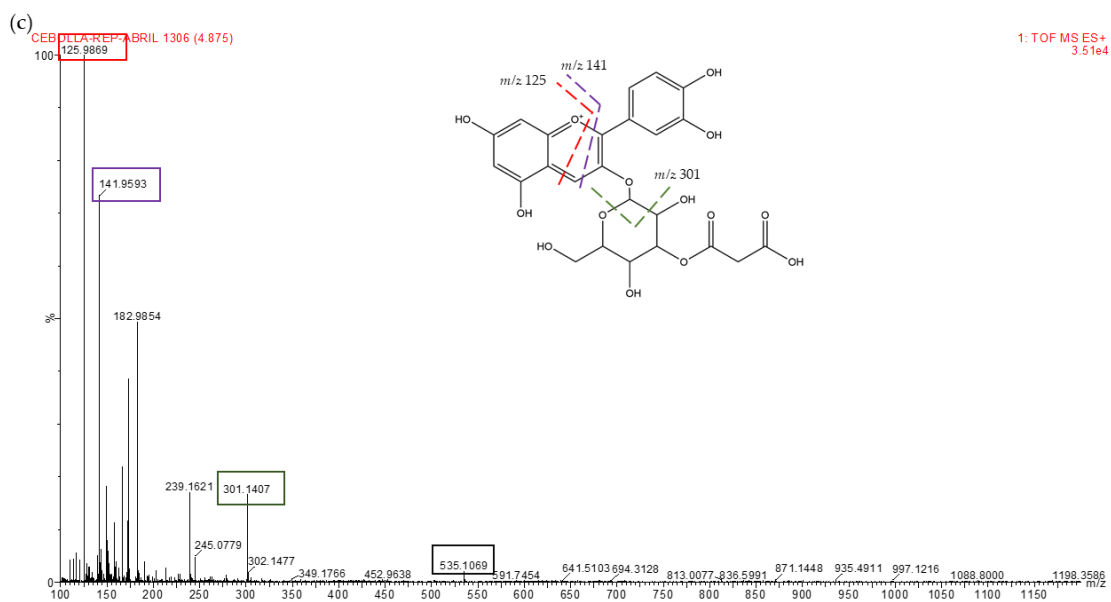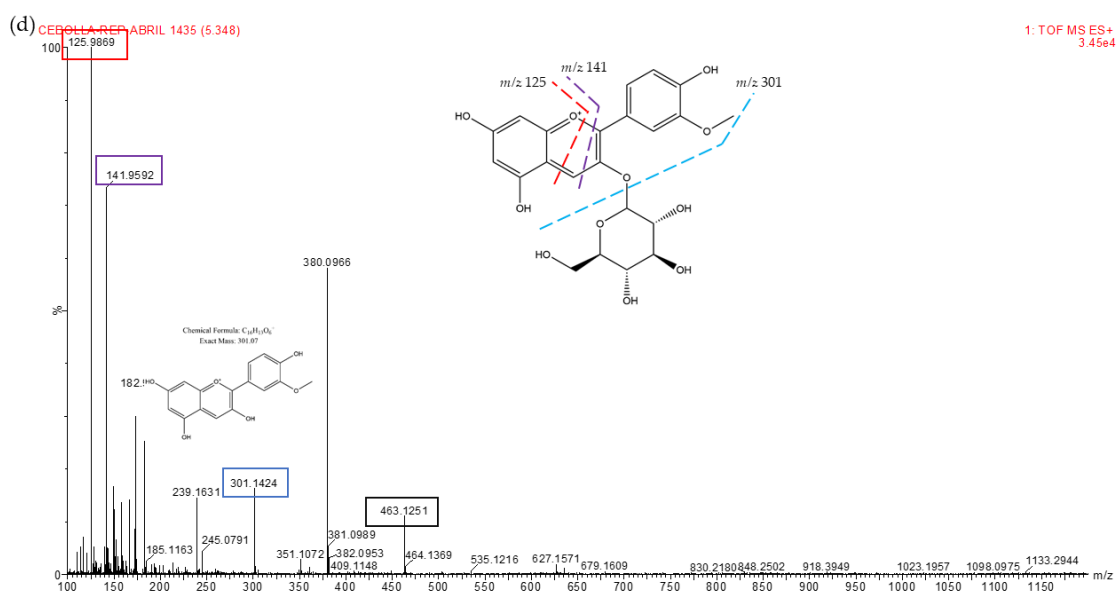

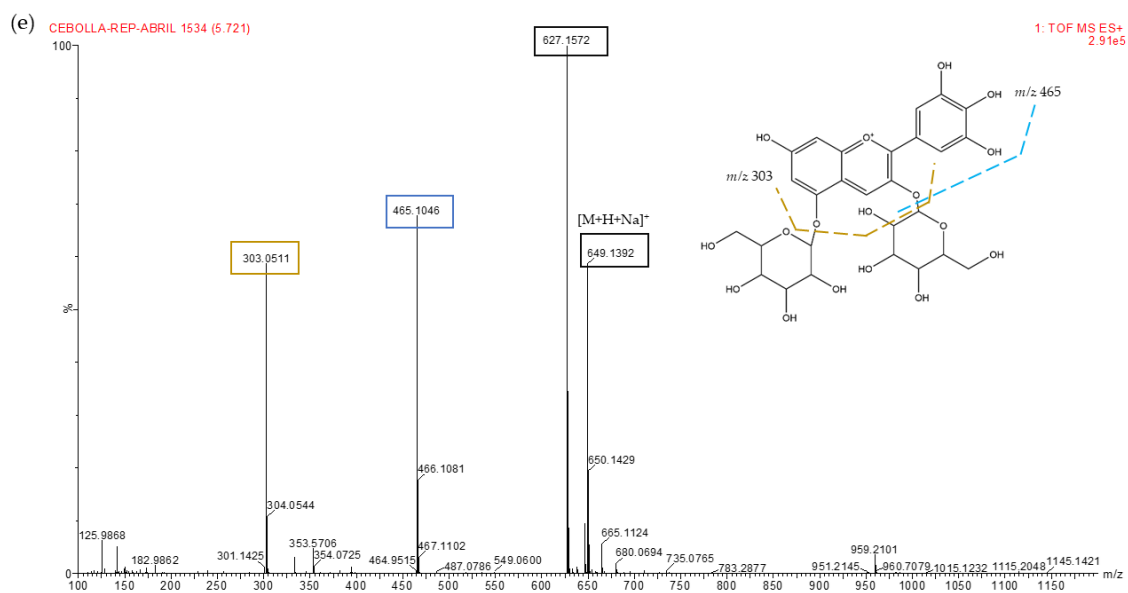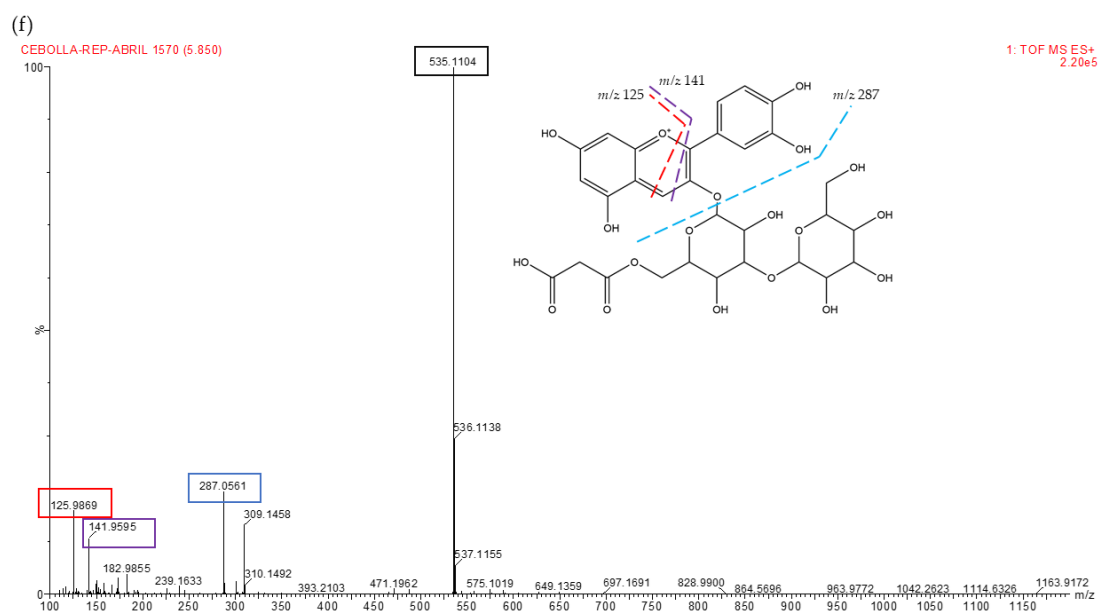

(g)

CEBOLLA-REP-ABRIL 1623 (6.052)

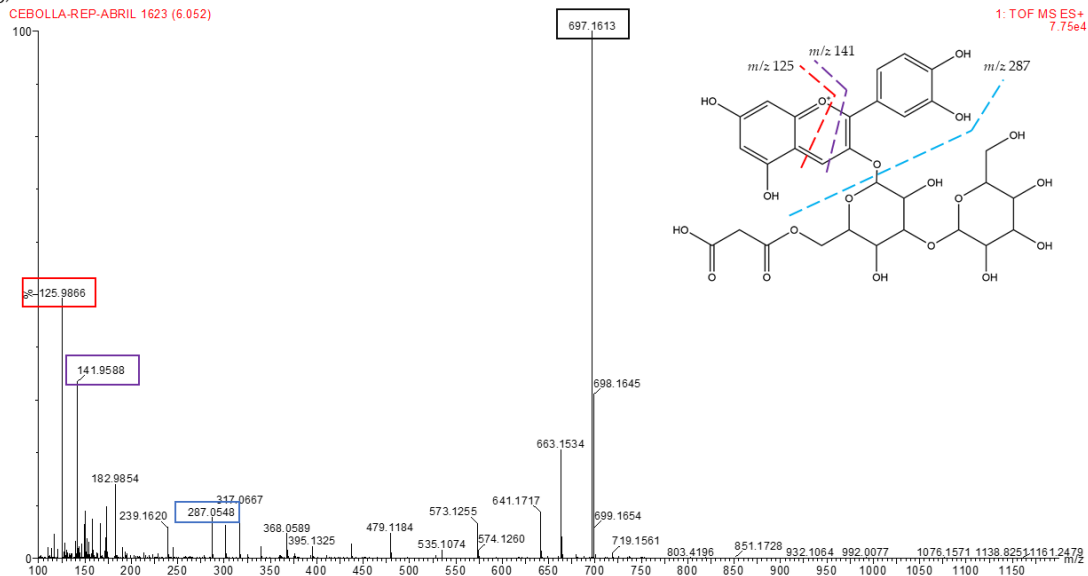

(h)

CEBOLLA-REP-ABRIL 1697 (6.323)

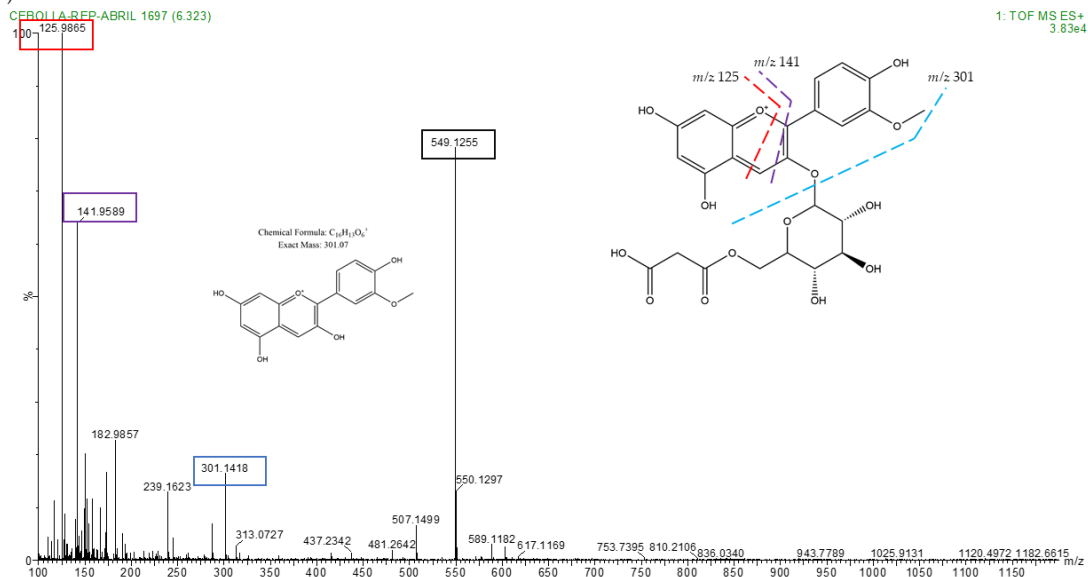

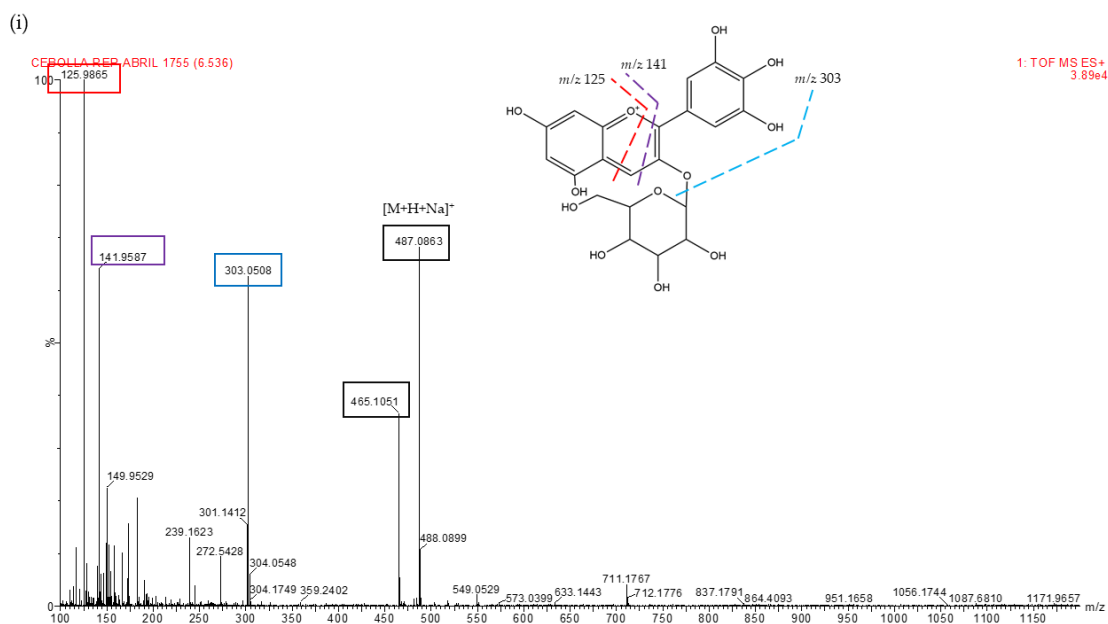

**Figure S2.** MS spectra and structure of the nine anthocyanins identified in onion bulb: (a) cyanidin 3-*O*-glucoside; (b) cyanidin 3-*O*-laminaribioside; (c) cyanidin 3-*O*-(3''-malonylglucoside); (d) peonidin 3-*O*-glucoside; (e) delphinidin 3,5-*O*-diglucoside; (f) cyanidin 3-*O*-(6''-malonylglucoside); (g) cyanidin 3-*O*-(6''-malonyl-laminaribioside); (h) peonidin 3-*O*-malonylglucoside; (i) delphinidin 3-*O*-glucoside. The molecular ion has been framed in black and the fragments in different colors.
